# Supplementary material for: Investigation of In Vitro Susceptibility and Resistance Mechanisms in Skin Pathogens: Perspectives for Fluoroquinolone Therapy in Canine Pyoderma
Source: MDPI journal article supplement (doi:10.3390/antibiotics11091204), 2022-09-06
Supplement: s1 [file s1]

## Supplementary information file

**Table S1.** Quality control growth ranges. \*ATCC = American Type Culture Collection

| Bacterial type                                 | Quality control             | Fluoroquinolone | Range (µg/mL) | Source              |
|------------------------------------------------|-----------------------------|-----------------|---------------|---------------------|
| <i>S. aureus</i><br><i>S. pseudintermedius</i> | <i>S. aureus</i> ATCC 29213 | Enrofloxacin    | 0.03-0.12     | CLSI VET01A4 (2013) |
|                                                |                             | Marbofloxacin   | 0.12-0.5      | CLSI VET01A4 (2013) |
|                                                |                             | Pradofloxacin   | 0.03-0.12     | CLSI VET01A4 (2013) |
|                                                |                             | Ciprofloxacin   | 0.125-0.5     | EUCAST 2022         |
|                                                |                             | Moxifloxacin    | 0.016-0.125   | EUCAST 2022         |
| <i>E. coli</i>                                 | <i>E. coli</i> ATCC 25922   | Enrofloxacin    | 0.008-0.03    | CLSI VET01A4 (2013) |
|                                                |                             | Marbofloxacin   | 0.008-0.03    | CLSI VET01A4 (2013) |
|                                                |                             | Pradofloxacin   | 0.008-0.03    | CLSI VET01A4 (2013) |
|                                                |                             | Ciprofloxacin   | 0.004-0.016   | EUCAST 2022         |
|                                                |                             | Moxifloxacin    | 0.008-0.06    | EUCAST 2022         |

**Table S2.** Fluoroquinolones (veterinary and human) clinical breakpoints (CBP)

| Bacterial type             | Drug | Susceptibility CBP<br>(µg/mL) | Resistance CBP<br>(µg/mL) | Source of CBP        | ECOFF<br>(µg/mL)    |
|----------------------------|------|-------------------------------|---------------------------|----------------------|---------------------|
| <i>S. aureus</i>           | ENR  | <4                            | ≥4                        | CLSI VET01S ED5:2020 |                     |
|                            | MAR  | <4                            | ≥4                        | CLSI VET01S ED5:2020 |                     |
|                            | PRA  | <2                            | ≥2                        | CLSI VET01S ED5:2020 |                     |
|                            | CIP  | <4                            | ≥4                        | CLSI M100- D32:2022  | 1 (EUCAST 2022)     |
|                            | MOX  | <2                            | ≥2                        | CLSI M100- D32:2022  | 0.25 (EUCAST 2022)  |
| <i>S. pseudintermedius</i> | ENR  | <4                            | ≥4                        | CLSI VET01S ED5:2020 | 0.5 (EUCAST 2022)   |
|                            | MAR  | <4                            | ≥4                        | CLSI VET01S ED5:2020 |                     |
|                            | PRA  | <2                            | ≥2                        | CLSI VET01S ED5:2020 |                     |
|                            | CIP  | <4                            | ≥4                        | CLSI M100- D32:2022  |                     |
|                            | MOX  | <2                            | ≥2                        | CLSI M100- D32:2022  |                     |
| <i>E. coli</i>             | ENR  | <4                            | ≥4                        | CLSI VET01S ED5:2020 | 0.125 (EUCAST 2022) |
|                            | MAR  | <4                            | ≥4                        | CLSI VET01S ED5:2020 |                     |
|                            | PRA  | <2                            | ≥2                        | CLSI VET01S ED5:2020 |                     |
|                            | CIP  | <1                            | ≥1                        | CLSI M100- D32:2022  | 0.06 (EUCAST 2022)  |
|                            | MOX  | ≤ 0.25                        | >0.25                     | EUCAST 2022          | 0.25 (EUCAST 2022)  |

**Figure S1.** MBC distributions in *S. aureus* (first row), *S. pseudintermedius* (second row) and *E. coli* (third row) of 5 fluoroquinolones. Blue dotted lines indicate the clinical breakpoint, the highest MIC value considered susceptible, and the epidemiological cut-off (ECOFF), the MIC value that separates wild-type from non wild-type bacteria.

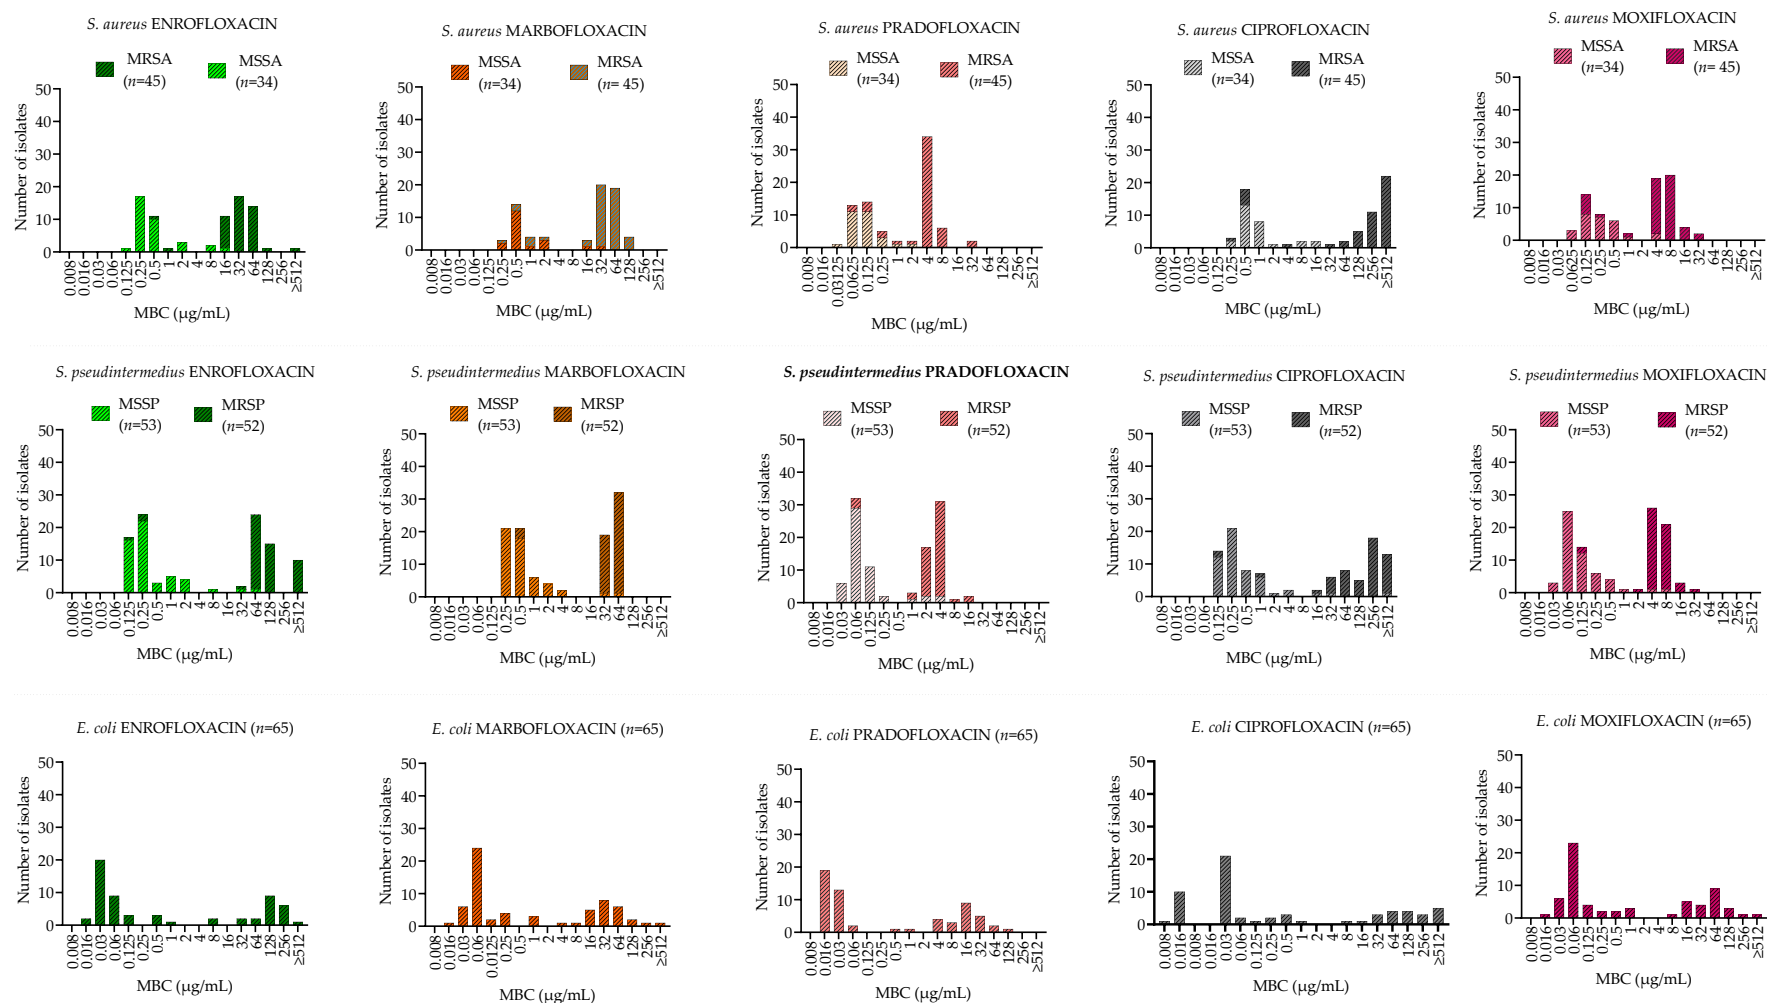

**Table S3.** Statistical comparison between MICs of veterinary and human FQs in *S. aureus*, *S. pseudintermedius* and *E. coli*. Anderson Darling test compared the areas of the distributions between MS, MR staphylococci and *E. coli* among the FQs. Friedman's test compared the medians (MIC<sub>50</sub>) of the aforementioned distributions. Dunn's post hoc analysis was carried out for pairwise comparison between FQs.

| Bacterial species        | Anderson Darling test<br>+ Friedman's test |     | Dunn's post hoc analysis<br>(Pairwise comparison) |           |          |           |           |
|--------------------------|--------------------------------------------|-----|---------------------------------------------------|-----------|----------|-----------|-----------|
|                          |                                            |     | ENR                                               | MAR       | PRA      | CIP       | MOX       |
| MSSA<br>(n=34)           | MSSA ***                                   | ENR | -                                                 | MSSA *    | MSSA *** | MSSA *    | MSSA (NS) |
|                          |                                            |     |                                                   | MRSA (NS) | MRSA *** | MRSA ***  | MRSA **   |
|                          | MRSA ***                                   | MAR | -                                                 | -         | MSSA *** | MSSA (NS) | MSSA ***  |
|                          |                                            |     |                                                   |           | MRSA *** | MRSA *    | MRSA ***  |
|                          |                                            | PRA | -                                                 | -         | -        | MSSA ***  | MSSA (NS) |
|                          |                                            |     |                                                   |           | MRSA *** | MRSA (NS) |           |
| MRSA<br>(n=45)           | MSSA ***                                   | CIP | -                                                 | -         | -        | -         | MSSA ***  |
|                          |                                            |     |                                                   |           |          |           | MRSA ***  |
|                          | MRSA ***                                   | MOX | -                                                 | -         | -        | -         | -         |
|                          |                                            |     |                                                   |           |          |           |           |
|                          |                                            | ENR | -                                                 | MSSP ***  | MSSP *** | MSSP (NS) | MSSP ***  |
|                          |                                            |     |                                                   | MRSP (NS) | MRSP *** | MRSP (NS) | MRSP ***  |
| MSSP<br>(n=53)           | MSSP ***                                   | MAR | -                                                 | -         | MSSP *** | MSSP (NS) | MSSP ***  |
|                          |                                            |     |                                                   |           | MRSP *** | MRSP (NS) | MRSP ***  |
|                          | MRSP ***                                   | PRA | -                                                 | -         | -        | MSSP ***  | MSSP (NS) |
|                          |                                            |     |                                                   |           |          | MRSP ***  | MRSP (NS) |
|                          |                                            | CIP | -                                                 | -         | -        | -         | MSSP ***  |
|                          |                                            |     |                                                   |           |          |           | MRSP ***  |
| MRSP<br>(n=52)           | MSSP ***                                   | MOX | -                                                 | -         | -        | -         | -         |
|                          |                                            |     |                                                   |           |          |           |           |
|                          | MRSP ***                                   | ENR | -                                                 | (NS)      | ***      | (NS)      | (NS)      |
|                          |                                            | MAR | -                                                 | -         | ***      | (NS)      | (NS)      |
|                          |                                            | PRA | -                                                 | -         | -        | ***       | ***       |
|                          |                                            | CIP | -                                                 | -         | -        | -         | (NS)      |
| <i>E. coli</i><br>(n=65) | ***                                        | MOX | -                                                 | -         | -        | -         | -         |
|                          |                                            |     |                                                   |           |          |           |           |
|                          | ***                                        | ENR | -                                                 | (NS)      | ***      | (NS)      | (NS)      |
|                          |                                            | MAR | -                                                 | -         | ***      | (NS)      | (NS)      |
|                          |                                            | PRA | -                                                 | -         | -        | ***       | ***       |
|                          |                                            | CIP | -                                                 | -         | -        | -         | (NS)      |

\*  $p < 0.05$ , \*\*  $p < 0.01$ , \*\*\*  $p < 0.001$ , NS = not statistically significant ( $p > 0.05$ ).

**Table S4.** Statistical comparison between MBCs of veterinary and human FQs in *S. aureus*, *S. pseudintermedius* and *E. coli*. Anderson Darling test compared the areas of the distribution between MS and MR staphylococci and in *E. coli* among the FQs. Friedman's test compared the medians (MBC<sub>50</sub>) of the beforementioned distributions. Dunn's post hoc analysis was carried out for pairwise comparison between FQs.

| Bacterial species        | Anderson Darling test<br>+ Friedman's test | Dunn's post hoc analysis<br>(Pairwise comparison) |                     |                      |                        |                        |
|--------------------------|--------------------------------------------|---------------------------------------------------|---------------------|----------------------|------------------------|------------------------|
| MSSA<br>(n=34)           | MSSA ***                                   | ENR                                               | MAR                 | PRA                  | CIP                    | MOX                    |
|                          |                                            | ENR                                               | MSSA *<br>MRSA (NS) | MSSA ***<br>MRSA *** | MSSA *<br>MRSA ***     | MSSA (NS)<br>MRSA ***  |
|                          | MRSA ***                                   | MAR                                               | -                   | MSSA ***<br>MRSA *** | MSSA (NS)<br>MRSA ***  | MSSA ***<br>MRSA ***   |
|                          |                                            | PRA                                               | -                   | -                    | MSSA ***<br>MRSA ***   | MSSA (NS)<br>MRSA (NS) |
|                          |                                            | CIP                                               | -                   | -                    | -                      | MSSA ***<br>MRSA ***   |
|                          |                                            | MOX                                               | -                   | -                    | -                      | -                      |
| MSSP<br>(n=53)           | MSSP ***                                   | ENR                                               | MAR                 | PRA                  | CIP                    | MOX                    |
|                          |                                            | ENR                                               | MSSP *<br>MRSP *    | MSSP ***<br>MRSP *** | MSSP (NS)<br>MRSP (NS) | MSSP ***<br>MRSP ***   |
|                          | MRSP ***                                   | MAR                                               | -                   | MSSP ***<br>MRSP *** | MSSP (NS)<br>MRSP **   | MSSP ***<br>MRSP ***   |
|                          |                                            | PRA                                               | -                   | -                    | MSSP ***<br>MRSP ***   | MSSP (NS)<br>MRSP (NS) |
|                          |                                            | CIP                                               | -                   | -                    | -                      | MSSP ***<br>MRSP ***   |
|                          |                                            | MOX                                               | -                   | -                    | -                      | -                      |
| <i>E. coli</i><br>(n=65) | ***                                        | ENR                                               | MAR                 | PRA                  | CIP                    | MOX                    |
|                          |                                            | ENR                                               | (NS)                | ***                  | (NS)                   | (NS)                   |
|                          |                                            | MAR                                               | -                   | ***                  | *                      | (NS)                   |
|                          |                                            | PRA                                               | -                   | -                    | ***                    | ***                    |
|                          |                                            | CIP                                               | -                   | -                    | -                      | *                      |
|                          |                                            | MOX                                               | -                   | -                    | -                      | -                      |

\*  $p < 0.05$ , \*\*  $p < 0.01$ , \*\*\*  $p < 0.001$ , NS = not statistically significant ( $p > 0.05$ )
